# Supplementary material for: Towards Reproducible Descriptions of Neuronal Network Models
Source: PLoS Comput Biol. 2009 Aug 7;5(8):e1000456. doi: 10.1371/journal.pcbi.1000456 (PMC2713426; doi:10.1371/journal.pcbi.1000456)
Supplement: Table S2 — Network connectivity description: placement and means. The presentation is the same as in Table S1. (0.10 MB PDF) [file pcbi.1000456.s002.pdf]

|                   | <b>Prose</b>                                                   | <b>Eqns.</b>            | <b>Figures</b>                          | <b>Tables</b> | <b>Refs.</b> | <b>Total</b> |
|-------------------|----------------------------------------------------------------|-------------------------|-----------------------------------------|---------------|--------------|--------------|
| <b>Paper</b>      | B, D,<br>HM, HT,<br>HvH, IE,<br>KG, L, M,<br>SE, TA,<br>TR, VA | B,<br>HvH,<br>TR,<br>WS | D, HM,<br>HvH, IE,<br>KG, SE,<br>TA, TR | SE            | WS           | 27           |
| <b>Appendix</b>   | HT, L                                                          | HT                      |                                         | L             |              | 4            |
| <b>Supplement</b> | IE, M, TA                                                      | IE, M                   | IE                                      | IE            |              | 7            |
| <b>Total</b>      | 18                                                             | 7                       | 9                                       | 3             | 1            | 38           |

**Table S2: Network connectivity description: placement and means.**  
The presentation is the same as in Table S1.
